# Supplementary material for: Immune profiling of pre- and post-treatment breast cancer tissues from the SWOG S0800 neoadjuvant trial
Source: J Immunother Cancer. 2019 Apr 10;7:88. doi: 10.1186/s40425-019-0563-7 (PMC6457012; doi:10.1186/s40425-019-0563-7)
Supplement: Supplementary file 2 — Table S1. Gene membership of the immune cell type metagenes and the immune function metagenes. (XLSX 36 kb) [file 40425_2019_563_MOESM2_ESM.xlsx]

## Sheet: Cell Type
B-cells	CD45	CD8 T cells	Cytotoxic cells	DC	Exhausted CD8	Macrophages	Mast cells	Neutrophils	NK CD56dim cells	NK cells	T-cells	Th1 cells	Treg
BLK	PTPRC	CD8A	CTSW	CCL13	CD244	CD163	MS4A2	CSF3R	IL21R	NCR1	CD3D	TBX21	FOXP3
CD19		CD8B	GNLY	CD209	EOMES	CD68	TPSAB1	S100A12	KIR2DL3	XCL2	CD3E
MS4A1			GZMA	HSD11B1	LAG3	CD84	CPA3	CEACAM3	KIR3DL1	XCL1	CD3G
TNFRSF17			GZMB		PTGER4	MS4A4A	HDC	FCAR	KIR3DL2		CD6
FCRL2			GZMH				TPSB2	FCGR3B			SH2D1A
KIAA0125			KLRB1					FPR1			TRAT1
PNOC			KLRD1					SIGLEC5
SPIB			KLRK1
TCL1A			PRF1
			NKG7

## Sheet: IO Signature
prolif	stroma	lymphoid	myleoid	Endothelial.cells	APM	MHC2	IFN.gamma	cytotoxicity	FCR	immunoproteasome	Apoptosis	Inflammatory.chemokines	Hypoxia	MAGEs	glycolytic.activity	IFN.downstream	Myleoid.inflam	B-cells	CD45	CD8 T cells	Cytotoxic cells	DC	Exhausted CD8	Macrophages	Mast cells	Neutrophils	NK CD56dim cells	NK cells	T-cells	Th1 cells	Treg	TIS	ARG1	NOS2	IDO1	PDL1	CTLA4	IL10	PDL2
MKI67	FAP	CXCL10	ITGAM	BCL6B	B2M	HLA-DRB5	STAT1	GZMA	FCGR1A	PSMB8	AXIN1	CCL2	BNIP3	MAGEA3	AKT1	IFI16	CXCL1	BLK	PTPRC	CD8A	CTSW	CCL13	CD244	CD163	MS4A2	CSF3R	IL21R	NCR1	CD3D	TBX21	FOXP3	CCL5	ARG1	NOS2	IDO1	CD274	CTLA4	IL10	PDCD1LG2
CEP55	COL6A3	CXCR3	TLR4	CDH5	TAP1	HLA-DPA1	CXCL9	GZMB	FCGR2A	PSMB9	BAD	CCL3	SLC2A1	MAGEA6	SLC2A1	IFI27	CXCL3	CD19		CD8B	GNLY	CD209	EOMES	CD68	TPSAB1	S100A12	KIR2DL3	XCL2	CD3E			CD27
KIF2C	ADAM12	CX3CL1	IL1B	CLEC14A	TAP2	HLA-DPB1	CXCL10	GZMH	FCGR3A	PSMB10	BAX	CCL4	PGK1	MAGEA1	HK2	IFI35	CXCL2	MS4A1			GZMA	HSD11B1	LAG3	CD84	CPA3	CEACAM3	KIR3DL1	XCL1	CD3G			CD274
MELK	OLFML2B	PRF1	CSF1R	CXorf36	TAPBP	HLA-DQB1	CXCL11	PRF1			BBC3	CCL7	BNIP3L	MAGEA12	TPI1	IFIH1	CCL20	TNFRSF17			GZMB		PTGER4	MS4A4A	HDC	FCAR	KIR3DL2		CD6			CD276
CENPF	PDGFRB	GZMK	CSF3R	EMCN	HLA-A	HLA-DRA		GNLY			BCL2L1	CCL8	P4HA1	MAGEA4	ENO1	IFIT1	AREG	FCRL2			GZMH				TPSB2	FCGR3B			SH2D1A			CD8A
EXO1	LRRC32	GZMB	TLR2	FAM124B	HLA-B	HLA-DRB1							ADM	MAGEB2	LDHA	IFIT2	FOSL1	KIAA0125			KLRB1					FPR1			TRAT1			CMKLR1
ANLN		CD27	TLR1	KDR	HLA-C	HLA-DMA							PDK1	MAGEC2	GOT1	IFITM1	CSF3	PNOC			KLRD1					SIGLEC5						CXCL9
RRM2		IL2RG	ITGAX	MMRN2		HLA-DOA							ALDOC	MAGEC1	GOT2	IFITM2	PTGS2	SPIB			KLRK1											CXCR6
UBE2C		KLRK1	HCK	MYCT1									PLOD2		GLUD1	APOL6	IER3	TCL1A			PRF1											HLA-DQA1
CCNB1		CTLA4	TLR8	PALMD									P4HA2		HK1	TMEM140	IL6				NKG7											HLA-DRB1
CDC20		GZMH	SLC11A1	ROBO4									MXI1			PARP9																HLA-E
		CD3D	CD47	SHE												TRIM21																IDO1
		KLRB1	CD14	TEK												DTX3L																LAG3
		KLRD1	CLEC4E	TIE1												PSMB9																NKG7
		LCK	CLEC7A													OAS1																PDCD1LG2
		CD5	FCAR													OAS2																PSMB10
		IRF4	FCN1													ISG15																STAT1
		CD8A	LILRA5													MX1																TIGIT
		CD38	LILRB2													IFI6
		EOMES	LYZ													IFIT3
		GZMM	NFAM1													IRF9
		GNLY	P2RY13													STAT2
		IFITM1	S100A8
		IDO1	S100A9
		MS4A1	SERPINA1
		GZMA	SIRPA
		CD2	SIRPB2
		CD3E	TREM1
		CD3G	CLEC5A
		CD40LG	CSF1
		CD6	CYBB
		CD7	FCGR1A
		CD79A	MARCO
		CD8B	NLRP3
		CXCL11	FPR1
		CXCL13	FPR3
		CXCL9	CCL3
		HLA-DOB	DAB2
		IFNG	OLR1
		LAG3	C5AR1
		LY9	TREM2
		PDCD1	MRC1
		TBX21	CEBPB
		TIGIT
		ZAP70
		SLAMF7
		CD96
		PVR
		STAT1
		JAK1
		JAK2
		STAT2
		IRF9
		IGF2R
		CD48
		ICOS
