# Supplementary material for: Immune profiling of pre- and post-treatment breast cancer tissues from the SWOG S0800 neoadjuvant trial
Source: J Immunother Cancer. 2019 Apr 10;7:88. doi: 10.1186/s40425-019-0563-7 (PMC6457012; doi:10.1186/s40425-019-0563-7)
Supplement: Supplementary file 3 — Table S2. Gene membership of the prognostic and immunotherapy response predictive gene signatures and corresponding references. (XLSX 40 kb) [file 40425_2019_563_MOESM3_ESM.xlsx]

## Sheet: Immune-Signature-Reference List
Subject	Method	Ref
Atezolizumab response in NSCLC	Fluidigm	Fehrenbacher L, Spira A, Ballinger M, et al. Atezolizumab versus docetaxel for patients with previously treated non-small-cell lung cancer (POPLAR): a multicentre, open-label, phase 2 randomised controlled trial. The Lancet. 2016 May 6;387(10030):1837-46.
PD1 response in NSCLC, HNSCC, Melanoma	Nanostring	Prat A, Navarro A, Paré L, et al. Immune-related gene expression profiling after PD-1 blockade in non-small cell lung carcinoma, head and neck squamous cell carcinoma and melanoma. Cancer Research; 77(13):3540-50 2017.
199 Affy probesets immune clusters	Affymetrix	Rody A, Holtrich U, Pusztai L, et al. T-cell metagene predicts a favorable prognosis in estrogen receptor-negative and HER2-positive breast cancers. Breast Cancer Research. 11(2):R15, 2009
TNBC prognostic immune metagenes	RNA-Seq	Karn T, Jiang T, Hatzis C, et al. Association between genomic metrics and immune infiltration in triple negative breast cancer. JAMA Oncology, published on line July 27, 2017.
Pembrolizumab response in melanoma, NSCLC, HNSCC	Nanostring	Ayers M, Lunceford J, Nebozhyn M, et al. IFN-γ–related mRNA profile predicts clinical response to PD-1 blockade. The Journal of Clinical Investigation. 2017 Jun 26;127(8).
Macrophage M1 and M2 signature	N/A	Mantovani A, Marchesi F, Malesci A, Laghi L, Allavena P. Tumour-associated macrophages as treatment targets in oncology. Nature Reviews Clinical Oncology. 14(7):399-416, 2017

## Sheet: Fehrenbacher 2016
T-effector IFNG signature
CD8A,
GZMA
GZMB
IFNG
EOMES
CXCL9
CXCL10
TBX21

## Sheet: Prat 2017 PMID 28487385
CD4_activated	CD8.T.cells	Cytotoxic.cells	DC	Treg	Neutrophils	NK.cells	Th1.cells	Tcells
IL26	PRF1	KLRK1	CD1E	FOXP3	CSF3R	SPN	CTLA4	CD3G
IL17A	CD8A	GZMH	CD1B	LILRA4	LILRB2	XCL2	LTA	CD96
	GZMM	KLRB1	CCL17			NCR1	IFNG	SH2D1A
	CD8B	KLRD1	CCL22				CD38	CD6
	FLT3LG	GZMA	CD1A				CCL4	CD3D
								LCK
								CD2
								CD3E

## Sheet: Rody 2009 PMID 19272155
Metagene Cluster	Affy_ID	Gene Symbol	Function / cell type	Description
IgG	205267_at	POU2AF1	B cell transcription factor	oct-binding factor POU domain class 2 associating factor 1 oct-binding factor POU domain, class 2, associating factor 1
IgG	209138_x_at	IGLC2 (genes in red are not included in Nanostring panel)	Immunoglobulin	rearranged immunoglobulin lambda light chain (hybridoma H210) anti-hepatitis A immunoglobulin lambda chain variable region constant region complementarity-determining regions d immunoglobulin lambda locus Ig lambda light chain; immunoglobulin
IgG	209374_s_at	IGHM	Immunoglobulin	IgM heavy chain constant region (Ab63) immunoglobulin heavy constant mu
IgG	211430_s_at	IGH@	Immunoglobulin	immunoglobulin lambda heavy chain (hybridoma H210) anti-hepatitis A IgG variable region constant region complementarity-determining regions d immunoglobulin heavy constant gamma 3 (Gm marker) constant region; IgG1; immunoglobulin; lambda heavy chain; variable region immunoglobulin lambda heavy chain immunoglobulin heavy constant gamma 3 (G3m marker)
IgG	211633_x_at	IGHG1	Immunoglobulin	Ig rearranged H-chain V-region (C-D-JH4)d
IgG	211634_x_at	IGHM	Immunoglobulin	Ig rearranged H-chain V-region (C-D-JH6)d
IgG	211635_x_at	IGHG3	Immunoglobulin	Ig rearranged H-chain V-region (C-D-JH6)d
IgG	211637_x_at	LOC388078	Immunoglobulin	Ig rearranged gamma-chain V-DXP4-JH6cd
IgG	211639_x_at	IGHM	Immunoglobulin	oo67b04.s1 Ig rearranged gamma-chain V-DXP1-JH4bd Human anti-B cell autoantibody IgM heavy chain variable V-D-J region (VH4) gene clone E11 VH4-63 non-productive rearrangement EST
IgG	211640_x_at	IGHG1	Immunoglobulin	Ig rearranged gamma-chain V-DK4-JH4bd
IgG	211641_x_at	IGHG1	Immunoglobulin	IG VH-region gened
IgG	211643_x_at	IGKC	Immunoglobulin	Ig rearranged kappa-chain gene V-J-regiond
IgG	211644_x_at	IGKC	Immunoglobulin	Ig rearranged kappa-chain gene V-J-regiond
IgG	211645_x_at	IGKC	Immunoglobulin	immunoglobulin kappa-chain VK-1 (IgK) d
IgG	211649_x_at	IGHG1	Immunoglobulin	wc37g12.x1 Ig rearranged mu-chain gene V-N-D-N-J-regiond integrin cytoplasmic domain-associated protein 1 EST
IgG	211650_x_at	IGHG1	Immunoglobulin	IgG heavy chain variable region (Vh26) Ig rearranged mu-chain gene VH3-D2110-JH2ds. polyreactiv Human rearranged immunoglobulin heavy chain mRNA partial cds IgG heavy chain variable region
IgG	211798_x_at	IGLJ3	Immunoglobulin	rearranged immunoglobulin lambda light chain for single-chain antibodyd immunoglobulin lambda locus Ig lambda light chain; immunoglobulin immunoglobulin lambda joining 3
IgG	211868_x_at	IGHG1	Immunoglobulin	for single-chain antibodyds
IgG	211881_x_at	IGLJ3	Immunoglobulin	rearranged immunoglobulin lambda light chain for VEGF single chain antibodyd immunoglobulin lambda locus Ig lambda light chain; immunoglobulin immunoglobulin lambda joining 3
IgG	211908_x_at	IGHG1	Immunoglobulin	IgG heavy chain variable region (Vh26) rearranged immunoglobulin heavy chain partial Human rearranged immunoglobulin heavy chain mRNA partial cds IgG heavy chain variable region
IgG	213502_x_at	LOC91316	Immunoglobulin	wo05c02.x1 immunoglobulin lambda-like polypeptide 3
IgG	214669_x_at	LOC440871	Immunoglobulin	Ig rearranged gamma chainV-J-C region and immunoglobulin kappa variable 3D-15 immunoglobulin kappa constant
IgG	214677_x_at	IGL@	Immunoglobulin	rearranged immunoglobulin lambda light chain rearranged immunoglobulin lambda light chain mRN immunoglobulin lambda locus Ig lambda light chain; immunoglobulin immunoglobulin lambda joining 3
IgG	214768_x_at	IGKC	Immunoglobulin	active IgK chain from GM 607 V-kappa-2 region
IgG	214777_at	IGKC	Immunoglobulin	rearranged gene for kappa immunoglobulin subgroup V kappa IV
IgG	214836_x_at	IGKC	Immunoglobulin	Ig rearranged gamma chainV-J-C region and kappa-immunoglobulin germline pseudogene (Chr22.4) variable region (subgroup V kappa II) immunoglobulin kappa constant
IgG	214916_x_at	IGH@	Immunoglobulin	IgG heavy chain variable region (Vh26) rearranged immunoglobulin heavy chain ds IgG heavy chain variable region
IgG	214973_x_at	IGHD	Immunoglobulin	partial IGVH3 gene for immunoglobulin heavy chain V region case 2 cell E 172
IgG	215121_x_at	IGL@	Immunoglobulin	rearranged immunoglobulin lambda light chain immunoglobulin lambda locus Ig lambda light chain; immunoglobulin
IgG	215176_x_at	IGKC	Immunoglobulin	partial IGKV gene for immunoglobulin kappa chain variable region clone 30
IgG	215214_at	IGLC2	Immunoglobulin	clone ASPBLL54 immunoglobulin lambda light chain VJ region clone ASPBLL54 immunoglobulin lambda light chain VJ region ds Homo sapiens clone ASPBLL54 immunoglobulin lambda light chain VJ region mRNA partial cds truncated protein immunoglobulin lambda light chain VJ region
IgG	215379_x_at	IGL@	Immunoglobulin	rearranged immunoglobulin lambda light chain immunoglobulin lambda joining 3 immunoglobulin lambda locus Ig lambda light chain; immunoglobulin
IgG	215946_x_at	IGLL1	Immunoglobulin	wo05c02.x1 DNA sequence from clone CTA-246H3 on chromosome 22 Contains the gene for IGLL1 (immunoglobulin lambda-like polypeptide 1 pre-B-cell specific) a pseudogene similar to LRP5 (Lipoprotein Receptor Related Protein.) ESTs Genomic markers (D22S. immunoglobulin lambda-like polypeptide 3
IgG	215949_x_at	IGHM	Immunoglobulin	HUMCSFGMA granulocyte-macrophage colony-stimulating factor (CSF1) gene colony stimulating factor 2 (granulocyte-macrophage) granulocyte-macrophage colony stimulating factor granulocyte-macrophage colony-stimulating factor
IgG	216207_x_at	IGKV1D-13	Immunoglobulin	germ line pseudogeneimmunoglobulin kappa light chain leader peptide and variable region (subgroup V kappa I) immunoglobulin kappa variable 1-13 germ line; Ig light chain; immunoglobulin; pseudogene; signal peptide; variable region immunoglobulin kappa light chain subgroup V
IgG	216365_x_at	IGLJ3	Immunoglobulin	clone bsmneg3-t7 immunoglobulin lambda light chain VJ region (IGL) ds
IgG	216401_x_at	- - -	Immunoglobulin	partial IGKV gene for immunoglobulin kappa chain variable region clone 38
IgG	216491_x_at	IGHM	Immunoglobulin	immunoglobulin heavy chain variable region (V4-31) gene immunoglobulin heavy chain variable region (V4-4) geneds Homo sapiens partial VH4-30 gene for rearranged immunoglobulin heavy chain variable region isolate case2-Ki67--158 Ig VH4 heavy chain immunoglobulin heavy chain variable region
IgG	216510_x_at	IGHG1	Immunoglobulin	IgG heavy chain variable region (Vh26) rearranged immunoglobulin heavy chain ds IgG heavy chain variable region
IgG	216557_x_at	IGHG1	Immunoglobulin	rearranged immunoglobulin heavy chain (A1VH3) gene
IgG	216560_x_at	IGLC2	Immunoglobulin	immunoglobulin lambda gene locus DNA clone:84 immunoglobulin lambda variable 3-10
IgG	216576_x_at	- - -	Immunoglobulin	isolate donor N clone N88K immunoglobulin kappa light chain variable region ds
IgG	216853_x_at	IGLJ3	Immunoglobulin	clone KM36 immunoglobulin light chain variable region ds
IgG	216984_x_at	IGLJ3	Immunoglobulin	immunoglobulin (mAb59) light chain V region sequence immunoglobulin (mAb59) light chain V region partial sequence immunoglobulin light chain V region immunoglobulin light chain V-J region
IgG	217148_x_at	IGLC2	Immunoglobulin	anti-streptococcalanti-myosin immunoglobulin lambda light chain variable region ds
IgG	217157_x_at	IGKC	Immunoglobulin	isolate donor N clone N8K immunoglobulin kappa light chain variable region ds
IgG	217179_x_at	IGL@	Immunoglobulin	(T1.1) for IG lambda light chain
IgG	217227_x_at	IGL@	Immunoglobulin	for IgG lambda light chain V-J-C region (clone Tgl11)
IgG	217235_x_at	IGLJ3	Immunoglobulin	immunoglobulin (mAb56) light chain V region partial sequence
IgG	217258_x_at	IGL	Immunoglobulin	IgG lambda light chain V-J-C region (clone Tgl4) clone ASMneg1-b3 immunoglobulin lambda chain VJ region (IGL) ds H.sapiens mRNA for IgG lambda light chain V-J-C region (clone Tgl9) constant region; immunoglobulin; immunoglobulin lambda chain; immunoglobulin light chain; joining region; variable region immunoglobulin lambda light chain VJC region
IgG	217281_x_at	IGHG1	Immunoglobulin	for immunoglobulin heavy chain variable region ID 3
IgG	217378_x_at	LOC391427	Immunoglobulin	V108 gene encoding an immunoglobulin kappa orph immunoglobulin kappa variable 1/OR2-108
IgG	217480_x_at	LOC339562	Immunoglobulin	kappa-immunoglobulin germline pseudogene (cos118) variable region (subgroup V kappa I) kappa-immunoglobulin germline pseudogene (cos118) variable region (subgroup V kappa I) immunoglobulin kappa variable 1/OR15-118 C-region; V-region; immunoglobulin-kappa; immunoglobulin-kappa subgroup vk-1; orphon; pseudogene Ig kappa chain
IgG	221651_x_at	IGKC	Immunoglobulin	Ig rearranged gamma chainV-J-C region and Similar to immunoglobulin kappa constant clone MGC:124 immunoglobulin kappa constant
IgG	221671_x_at	IGKC	Immunoglobulin	Ig rearranged gamma chainV-J-C region and Ig rearranged gamma chain V-J-C region and complete cd immunoglobulin kappa constant
HCK	201422_at	IFI30	IFN gamma response	HUMIIP gamma-interferon-inducible protein (IP-30) interferon gamma-inducible protein 30 interferon, gamma-inducible protein 30
HCK	201720_s_at	LAPTM5	hematopoietic cells	lysosomal-associated multitransmembrane protein (LAPTm5) Lysosomal-associated multispanning membrane protein-5 Lysosomal-associated multispanning membrane protein-5
HCK	201721_s_at	LAPTM5	hematopoietic cells	lysosomal-associated multitransmembrane protein (LAPTm5) Lysosomal-associated multispanning membrane protein-5 Lysosomal-associated multispanning membrane protein-5
HCK	202803_s_at	ITGB2	subunit of complement receptors	leukocyte adhesion protein (LFA-1 Mac-1 p150 95 family) beta subunit integrin beta 2 (antigen CD18 (p95) lymphocyte function-associated antigen 1 macrophage antigen 1 (mac-1) beta subunit) cell adhesion molecule; cell surface glycoprotein; glycoprotein; leukocyte adhesion protein leukocyte adhesion protein beta-subunit precursor integrin beta chain, beta 2 precursor integrin, beta 2 (antigen CD18…
HCK	202953_at	C1QB	complement system	C1q B-chain of complement system complement component 1 q subcomponent betapolypeptide precursor complement component 1 q subcomponent beta polypeptide complement component 1, q subcomponent, beta polypeptide
HCK	203473_at	SLCO2B1	-	KIAA0880 protein solute carrier family 21 (organic anion transporter) member 9 solute carrier family 21 (organic anion transporter), member 9
HCK	203645_s_at	CD163	macrophages	M130 antigen extracellular variant CD163 antigen antigen; antigen M130 M130 antigen extracellular variant
HCK	204122_at	TYROBP	monocyte / myeloid / dendritic cells	zd27g05.s1 TYRO protein tyrosine kinase binding protein
HCK	204232_at	FCER1G	FCeR (mast cells, basophiles)	Fc-epsilon-receptor gamma-chain Fc fragment of IgE high affinity I receptorfor gamma polypeptide precursor Fc fragment of IgE high affinity I receptor for; gamma polypeptide Fc-epsilon-receptor gamma-chain protein Fc-epsilon-receptor gamma-chain protein precursor Fc fragment of IgE, high affinity I, receptor for, gamma polypeptide precursor Fc fragment of IgE, high affinity I, receptor for; gamma
HCK	204588_s_at	SLC7A7	-	glycoprotein-associated amino acid transporter y+LAT1 solute carrier family 7 (cationic amino acid transporter y+ system) member 7 glycoprotein-associated amino acid transporter; y+LAT1 gene glycoprotein-associated amino acid transporter solute carrier family 7 (cationic amino acid transporter,
HCK	205098_at	CCR1	macrophages	HM145 chemokine (C-C motif) receptor 1
HCK	206715_at	TFEC	monocyte / myeloid / dendritic cells	TFEC isoform (or TFECL) transcription factor EC TFEC TFEC isoform (or TFECL)
HCK	208018_s_at	HCK	monocyte / myeloid / dendritic cells	hemopoietic cell protein-tyrosine kinase (HCK) gene clone lambda-a2 1a hemopoietic cell kinase
HCK	209949_at	NCF2	monocyte / myeloid / dendritic cells	neutrophil oxidase factor (p67-phox) Similar to neutrophil cytosolic factor 2 (65kD chronic granulomatous disease autosomal 2) clone MGC:22 neutrophil cytosolic factor 2 (65kD chronic granulomatous disease autosomal 2) neutrophil cytosolic factor 2 (65kD, chronic granulomatous
HCK	210644_s_at	LAIR1	myeloid / T / B cells	leukocyte-associated Ig-like receptor-1 (LAIR-1) leukocyte-associated Ig-like receptor 1b d leukocyte-associated Ig-like receptor 1 membrane glycoprotein leukocyte-associated Ig-like receptor 1
HCK	210895_s_at	CD86	B7-2 costimulatory molecule of APCs	om19c02.s1 CTLA4 counter-receptor (B7-2) d ESTs CD86 antigen (CD28 antigen ligand 2, B7-2 antigen)
HCK	215049_x_at	CD163	macrophages	M130 antigen cytoplasmic variant 2 for M130 antigen cytoplasmic variant CD163 antigen antigen; antigen M130 CD163 antigen
HCK	218232_at	C1QA	complement system	ws52e08.x1 complement component 1 q subcomponent alphapolypeptide precursor complement component 1 q subcomponent alpha polypeptide EST complement component 1, q subcomponent, alpha polypeptide
HCK	219607_s_at	MS4A4A	-	membrane-spanning 4-domains subfamily A member 4 membrane-spanning 4-domains, subfamily A, member 4
HCK	204959_at	MNDA	IFN gamma response	myeloid cell nuclear differentiation antigen myeloid cell nuclear differentiation antigen interferon response element; interferon stimulated gene; interferon-alpha; myeloid cell nuclear differentiation antigen myeloid cell nuclear differentiation antigen
HCK	209901_x_at	AIF1	IFN gamma response	allograft inflammatory factor-1 (AIF-1) allograft-inflammatory factor-1 d allograft inflammatory factor 1 interferon gamma responsive transcript
HCK	210629_x_at	LST1	monocyte / myeloid / dendritic cells	LST1cLST1 C splice variant LST1 cLST1A splice variantd DNA segment on chromosome 6 (unique) 49 expressed sequence cLST1/C splice variant DNA segment on chromosome 6 (unique) 49 expressed sequence lymphocyte antigen 117
HCK	211581_x_at	LST1	monocyte / myeloid / dendritic cells	LST1cLST1 C splice variant LST1 cLST1E splice variantd DNA segment on chromosome 6 (unique) 49 expressed sequence cLST1/C splice variant DNA segment on chromosome 6 (unique) 49 expressed sequence lymphocyte antigen 117
HCK	211582_x_at	LST1	monocyte / myeloid / dendritic cells	LST1cLST1 C splice variant LST1 cLST1C splice variantd DNA segment on chromosome 6 (unique) 49 expressed sequence cLST1/C splice variant DNA segment on chromosome 6 (unique) 49 expressed sequence lymphocyte antigen 117
HCK	213095_x_at	AIF1	IFN gamma response	allograft inflammatory factor-1 (AIF-1) allograft inflammatory factor-1 splice variant G1 d allograft inflammatory factor 1 interferon gamma responsive transcript
HCK	213160_at	DOCK2	leucocytes	KIAA0209 gene for KIAA0209 gened dedicator of cyto-kinesis 2 KIAA0209 similar to a human major CRK-binding protein DOCK180.
HCK	213566_at	RNASE6	-	qb47d08.x1 ribonuclease RNase A family k6 EST ribonuclease, RNase A family, k6
HCK	214181_x_at	LST1	monocyte / myeloid / dendritic cells	LST1cLST1 C splice variant lymphocyte antigen 117 DNA segment on chromosome 6 (unique) 49 expressed sequence cLST1/C splice variant DNA segment on chromosome 6 (unique) 49 expressed sequence
HCK	214574_x_at	LST1	monocyte / myeloid / dendritic cells	LST1cLST1 C splice variant DNA segment on chromosome 6 (unique) 49 expressed sequence NK cell triggering receptor p30 DNA segment on chromosome 6 (unique) 49 expressed sequence cLST1/C splice variant DNA segment on chromosome 6 (unique) 49 expressed sequence lymphocyte antigen 117
HCK	215051_x_at	AIF1	IFN gamma response	allograft inflammatory factor-1 (AIF-1) allograft inflammatory factor 1 interferon gamma responsive transcript
HCK	215633_x_at	LST1	monocyte / myeloid / dendritic cells	LST1cLST1 C splice variant for LST-1N protein DNA segment on chromosome 6 (unique) 49 expressed sequence cLST1/C splice variant DNA segment on chromosome 6 (unique) 49 expressed sequence lymphocyte antigen 117
HCK	219666_at	MS4A6A	-	qz35a05.x1 membrane-spanning 4-domains subfamily A member6 Homo sapiens cDNA: FLJ22801 fis clone KAIA2674 membrane-spanning 4-domains, subfamily A, member 6A
MHC-II	201137_s_at	HLA-DPB1	MHC II component	MHC class II lymphocyte antigen (HLA-DP) beta chain major histocompatibility complex class II DP beta 1 major histocompatibility complex, class II, DP beta 1
MHC-II	201858_s_at	PRG1	-	hematopoetic proteoglycan core protein secretory granule proteoglycan peptide core d proteoglycan 1 secretory granule haematopoetic proteoglycan core protein hematopoetic proteoglycan core protein (AA 1 - 158) proteoglycan 1, secretory granule
MHC-II	202902_s_at	CTSS	MHC II pathway peptidase	wg62c06.x1 cathepsin S
MHC-II	203932_at	HLA-DMB	MHC II component	HLA-DMB major histocompatibility complex class II DM beta major histocompatibility complex, class II, DM beta
MHC-II	204670_x_at	HLA-DRB1	MHC II component	MHC class II HLA-DR beta-1 (DR2.3) 5end major histocompatibility complex class II DR beta 5 major histocompatibility complex class II DR beta 1 major histocompatibility complex, class II, DR beta 5
MHC-II	205270_s_at	LCP2	T-cell activation	76 kDa tyrosine phosphoprotein SLP-76 lymphocyte cytosolic protein 2 (SH2 domain-containing leukocyte protein of 76kD)
MHC-II	207238_s_at	PTPRC	CD45 / leukocyte common antigen	leukocyte common antigen (T200) protein tyrosine phosphatase receptor type C protein tyrosine phosphatase, receptor type, C
MHC-II	208306_x_at	HLA-DRB1	MHC II component	MHC class II HLA-DR beta-1 (DR2.3) 5end major histocompatibility complex class II DR beta 4 major histocompatibility complex class II DR beta 1 major histocompatibility complex, class II, DR beta 4
MHC-II	208894_at	HLA-DRA	MHC II component	major histocompatibility complex class II DR alpha major histocompatibility complex, class II, DR alpha
MHC-II	209312_x_at	HLA-DRB1	MHC II component	MHC class II HLA-DR beta-1 (DR2.3) 5end MHC class II antigen (HLA-DRB1) HLA-DRB1*PBL alleled major histocompatibility complex class II DR beta 1 major histocompatibility complex, class II, DR beta 1
MHC-II	209619_at	CD74	MHC II component	Ia-associated invariant gamma-chain gene CD74 antigen (invariant polypeptide of major histocompatibility complex class II antigen-associated) Ia-associated gamma chain; cell surface glycoprotein Ia-associated gamma chain cell surface glycoprotein
MHC-II	210982_s_at	HLA-DRA	MHC II component	major histocompatibility complex class II DR alpha
MHC-II	211991_s_at	HLA-DPA1	MHC II component	SB classII histocompatibility antigen alpha-chain for SB classII histocompatibility antigen alpha-chain major histocompatibility complex class II DP alpha 1 major histocompatibility complex, class II, DP alpha
MHC-II	212671_s_at	HLA-DQA1	MHC II component	ak41e04.s1 major histocompatibility complex class II DQ alpha 1 EST
MHC-II	215193_x_at	HLA-DRB1	MHC II component	oc35c12.s1 for MHC class II antigen (HLA-DRB1 gene) DRB1*0402 allel ESTs
MHC-II	217478_s_at	HLA-DMA	MHC II component	RING6 HLA class II alpha chain-like product major histocompatibility complex class II DM alpha HLA class II antigen HLA class II alpha chain-like major histocompatibility complex, class II, DM alpha
LCK	1405_i_at	CCL5	T-cell / NK-cell	small inducible cytokine A5 (RANTES)
LCK	218870_at	ARHGAP15	Rho GAP	nx93e05.s1 uncharacterized bone marrow protein BM046
LCK	206978_at	CCR2	monocyte chemokine receptor	ccr2b (ccr2) ccr2a (ccr2) ccr5 (ccr5) and ccr6 (ccr6) genes and lactoferrin (lactoferrin) gene chemokine (C-C motif) receptor 2 chemokine (C-C motif) receptor-like 2
LCK	206337_at	CCR7	T-cell / B-cell chemokine receptor	HUMEBI103 G protein-coupled receptor (EBI 1) gene exon 3 chemokine (C-C motif) receptor 7 G protein-coupled receptor
LCK	205831_at	CD2	T-cell	T-cell surface antigen CD2 (T11) clone PB1 CD2 antigen (p50) sheep red blood cell receptor CD2 antigen (p50), sheep red blood cell receptor
LCK	213539_at	CD3D	T-cell receptor	ol84h02.s1 CD3D antigen delta polypeptide (TiT3 complex) CD3D antigen, delta polypeptide (TiT3 complex)
LCK	210031_at	CD3Z	T-cell receptor	T cell receptor zeta-chain T cell receptor zeta-chain d CD3Z antigen zeta polypeptide (TiT3 complex) T cell receptor zeta-chain T-cell receptor zeta chain precursor CD3Z antigen, zeta polypeptide (TiT3 complex)
LCK	204118_at	CD48	T-cell / B-cell / NK-cell	MEM-102 glycoprotein CD48 antigen (B-cell membrane protein) MEM-102 glycoprotein; leukocyte antigen CD48 antigen (B-cell membrane protein)
LCK	203416_at	CD53	T-cell / NK-cell	CD53 glycoprotein CD53 antigen
LCK	209083_at	CORO1A	leucocytes	actin binding protein p57 coronin-like protein (HCORO1) d coronin actin-binding protein 1A coronin, actin binding protein, 1A
LCK	205159_at	CSF2RB	subunit of GM-CSF- / IL3- / IL5- receptor	yj49e08.r1 colony stimulating factor 2 receptor beta low-affinity (granulocyte-macrophage) ESTs colony stimulating factor 2 receptor, beta, low-affinity
LCK	204923_at	CXorf9	-	DNA sequence from clone 753P9 on chromosome Xq25-26.1. Contains the gene codingAminopeptidase P (EC 3.4.11.9 XAA-Pro X-Pro DNA sequence from clone 753P9 on chromosome Xq25-26.1. Contains the gene coding for Aminopeptidase P (EC 3.4.11.9 XAA-ProX-ProProlineAminoacylproline Aminopeptidase) and a novel gene. Contains ESTs STSs GSSs and a gaaa repeat polymorphi hypothetical protein likely ortholog of…
LCK	211742_s_at	EVI2B	lymphocytes	EVI2B3P gene exon and ecotropic viral integration site 2B clone MGC:145 ecotropic viral integration site 2B
LCK	204834_at	FGL2	-	tg73b09.x1 fibrinogen-like 2
LCK	219243_at	GIMAP4	immune cells	wg53b12.x1 hypothetical protein FLJ11110
LCK	218805_at	GIMAP5	immune cells	th95b11.x1 hypothetical protein FLJ11296 immune associated nucleotide 4 like 1 (mouse)
LCK	64064_at	GIMAP5	immune cells	th95b11.x1 hypothetical protein FLJ11296 likely homolog of mouse immunity-associated nucleotide
LCK	204220_at	GMFG	-	za93f08.r1 glia maturation factor gamma EST glia maturation factor, gamma
LCK	205488_at	GZMA	T-cell	Hanukah factor serine protease (HuHF) granzyme A (granzyme 1 cytotoxic T-lymphocyte-associated serine esterase 3) granzyme A (granzyme 1, cytotoxic T-lymphocyte-associated
LCK	206666_at	GZMK	CTL / NK-cell granzyme	pre-granzyme 3 granzyme K (serine protease granzyme 3 tryptase II) granzyme K precursor granzyme K (serine protease, granzyme 3; tryptase II)
LCK	202957_at	HCLS1	hematopoietic cells	HS1 geneheamatopoietic lineage cell specific protein hematopoietic cell-specific Lyn substrate 1 haematopoietic lineage cell specific protein; HS1 gene haematopoietic lineage cell protein (AA 1-486) hematopoietic cell-specific Lyn substrate 1
LCK	209734_at	HEM1	hematopoietic cells	membrane-associated protein (HEM-1) hematopoietic protein 1 clone MGC:22 membrane-associated protein hematopoietic protein 1
LCK	204912_at	IL10RA	IL10-receptor, T-/NK-cells	U00672 interleukin-10 receptor interleukin 10 receptor alpha interleukin-10 receptor interleukin 10 receptor, alpha
LCK	204116_at	IL2RG	IL2-Receptor (T-, NK-, B-cells)	HUMIL2RG interleukin 2 receptor gamma chain interleukin 2 receptor gamma (severe combined immunodeficiency) interleukin 2 receptor; interleukin 2 receptor gamma chain interleukin 2 receptor gamma chain interleukin 2 receptor, gamma (severe combined immunodeficiency)
LCK	205798_at	IL7R	IL7-Receptor	HUMIL7AA interleukin-7 receptor (IL-7) interleukin 7 receptor interleukin 7 receptor interleukin-7 receptor precursor interleukin 7 receptor
LCK	203332_s_at	INPP5D	hematopoietic cells	HSU57650 SH2-containing inositol 5-phosphatase (hSHIP) inositol polyphosphate-5-phosphatase 145kD type II 5-inositol phosphatase SH2-containing inositol 5-phosphatase inositol polyphosphate-5-phosphatase, 145kD
LCK	204057_at	IRF8	interferon response	oy66c05.x1 interferon consensus sequence binding protein 1
LCK	211339_s_at	ITK	T-cell specific kinase	HUMTKTCS T cell-specific tyrosine kinase IL2-inducible T-cell kinase tyrosine kinase 2024-2555 unique domain; 2556-2708 SH3 domain; 2750-3044 Sh2 domain (binds phosphotyrosine-containing proteins); 3095-3884 kiase domain (phophorylation of tyrosine residues).; putative tyrosine kinase
LCK	38149_at	KIAA0053	-	KIAA0053 gene for KIAA0053 gene KIAA0053 gene product
LCK	205821_at	KLRK1	NK-cell	NKG2D gene exons 2-5 and joined and CDS DNA segment on chromosome 12 (unique) 2489 expressed sequence NKG2 gene; NKG2D gene DNA segment on chromosome 12 (unique) 2489 expressed sequence
LCK	204891_s_at	LCK	T-cell specific	T-lymphocyte specific protein tyrosine kinase p56lck (lck) abberant lymphocyte-specific protein tyrosine kinase truncated form of T-lymphocyte-specific protein tyrosine kinase p56lck; this abberant message encoding primarily the SH2 and SH3 domains of p56lck was observed by nothern hybridization and PCR amplification in poly-A selected RNA from two human leukemic T p56lck
LCK	205269_at	LCP2	T-cell activation	76 kDa tyrosine phosphoprotein SLP-76 lymphocyte cytosolic protein 2 (SH2 domain-containing leukocyte protein of 76kD)
LCK	216250_s_at	LPXN	hematopoietic cells	leupaxin laminin alpha 3 (nicein (150kD) kalinin (165kD) BM600 (150kD) epilegrin) leupaxin similar to paxillin leupaxin
LCK	207339_s_at	LTB	lymphotoxin, B-cell	DNA cosmid clones TN62 and TN82 lymphotoxin beta (TNF superfamily member 3) (LTB) transcript variant Homo sapiens DNA cosmid clones TN62 and TN82 lymphotoxin beta (TNF superfamily, member 3)
LCK	203879_at	PIK3CD	PI3-kinase	phosphatidylinositol 3-kinase catalytic subunit p110delta phosphatidylinositol 3-kinase catalytic subunit p110delta d phosphoinositide-3-kinase catalytic delta polypeptide PI-3 kinase catalytic subunit phosphatidylinositol 3-kinase catalytic subunit p110delta phosphoinositide-3-kinase, catalytic, delta polypeptide
LCK	219014_at	PLAC8	-	zl07e03.r1 hypothetical protein
LCK	201859_at	PRG1	-	hematopoetic proteoglycan core protein proteoglycan 1 secretory granule haematopoetic proteoglycan core protein hematopoetic proteoglycan core protein (AA 1 - 158) proteoglycan 1, secretory granule
LCK	209685_s_at	PRKCB1	protein kinase C beta	protein kinase C beta-II type (PRKCB1) d protein kinase C, beta 1
LCK	212588_at	PTPRC	CD45 / leukocyte common antigen	T200 leukocyte common antigen (CD45 LC-A) protein tyrosine phosphatase receptor type C protein tyrosine phosphatase, receptor type, C
LCK	213603_s_at	RAC2	leucocytes	zd37g06.r1 HSPC022 protein EST
LCK	220330_s_at	SAMSN1	adaptor protein	wj28c05.x1 SAM domain SH3 domain and nuclear localisation signals 1 Homo sapiens chromosome 21 segment HS21C006 EST SAM domain, SH3 domain and nuclear localisation signals,
LCK	204655_at	SCYA5	T-cell specific (RANTES)	HUMTCSM T cell-specific protein (RANTES) small inducible cytokine A5 (RANTES) Alu repeat; T-cell-specific protein T cell-specific protein precursor small inducible cytokine A5 (RANTES)
LCK	204563_at	SELL	L-selectin (leukocyte homing)	HUMLNHR lymph node homing receptor selectin L (lymphocyte adhesion molecule 1) lymph node homing receptor precursor selectin L
LCK	209879_at	SELPLG	stimul. T-cells and myeloid cells	P-selectin glycoprotein ligand (SELPLG) gene selectin P ligand selectin P ligand
LCK	210116_at	SH2D1A	T-B-cell communication	SH2D1Aformerly known as DSHP SH2 domain protein 1A Duncans disease (lymphoproliferative syndrome) SH2 domain protein 1A Duncan's disease (lymphoproliferative syndrome) SH2 domain protein 1A, Duncan's disease (lymphoproliferative
LCK	203761_at	SLA	T-cell receptor regulation	D89077 Src-like adapter protein Src-like-adapter Src-like adapter protein Src-like-adaptor
LCK	206181_at	SLAMF1	B-cell / T-cell	signaling lymphocytic activation molecule (SLAM) signaling lymphocytic activation molecule signaling lymphocytic activation molecule
LCK	206118_at	STAT4	T-cell differentiation	HUMSTAT4R STAT4 signal transducer and activator of transcription 4
LCK	206150_at	TNFRSF7	T-cell activation	T cell activation antigen (CD27) tumor necrosis factor receptor superfamily member 7 tumor necrosis factor receptor superfamily, member 7
LCK	209670_at	TRA@	T-cell receptor	HUMTCAXB T-cell receptor active alpha-chain from JM cell line T-cell receptor active alpha-chain from JM cell lineds C-region; D-region; J-region; T-cell receptor; V-region; antigen receptor T-cell receptor alpha-chain (VDJC) T cell receptor alpha locus
LCK	210915_x_at	TRBC1	T-cell receptor	T-cell specific protein T-cell receptor rearranged beta-chain V-region (V-D-J) d T cell receptor beta locus T-cell; unidentified reading frame T-cell receptor beta-chain
LCK	211796_s_at	TRBC1	T-cell receptor	T-cell specific protein T cell receptor beta chain (TCRBV13S1-TCRBJ2S1) d T cell receptor beta locus T-cell; unidentified reading frame T-cell receptor beta-chain
LCK	213193_x_at	TRBC1	T-cell receptor	T-cell specific protein T cell receptor beta locus T-cell; unidentified reading frame T-cell receptor beta-chain
MHC-I	204806_x_at	HLA-F	MHC I component	te53h07.x1 major histocompatibility complex class I F EST major histocompatibility complex, class I, F
MHC-I	208729_x_at	HLA-B	MHC I component	wz58b02.x1 major histocompatibility complex class I B EST
MHC-I	208812_x_at	HLA-B	MHC I component	HLA class I locus C heavy chain major histocompatibility complex class I C clone MGC:110 major histocompatibility complex class I C histocompatability antigen; HLA class I heavy chain; HLA class I locus C HLA class I heavy chain major histocompatibility complex, class I, C
MHC-I	209140_x_at	HLA-B	MHC I component	wz58b02.x1 major histocompatibility complex class I B EST major histocompatibility complex, class I, B
MHC-I	210514_x_at	HLA-G	MHC I component	dJ377H14.1 (major histocompatibility complex class I G (HLA 6.0)) MHC class I antigen (HLA-G) HLA-G1 alleled HLA-G histocompatibility antigen, class I, G
MHC-I	211528_x_at	HLA-G	MHC I component	dJ377H14.1 (major histocompatibility complex class I G (HLA 6.0)) lymphocyte antigen (HLA-G2.2) d
MHC-I	211529_x_at	HLA-G	MHC I component	dJ377H14.1 (major histocompatibility complex class I G (HLA 6.0)) lymphocyte antigen (HLA-G2.1) d
MHC-I	211799_x_at	HLA-A	MHC I component	HLA class I heavy chain (HLA-Cw*1701) d
MHC-I	211911_x_at	HLA-B	MHC I component	wz58b02.x1 major histocompatibility complex class I B EST
MHC-I	213932_x_at	HLA-A	MHC I component	HLA class-I (HLA-A26) heavy chain (clone cMIY-1) major histocompatibility complex class I A
MHC-I	214459_x_at	HLA-C	MHC I component	Cw1 antigen d
MHC-I	215313_x_at	HLA-A	MHC I component	HLA class-I (HLA-A26) heavy chain (clone cMIY-1) major histocompatibility complex class I A
MHC-I	216526_x_at	HLA-C	MHC I component	HLA class I locus C heavy chain : FLJ21183 fis clone CAS11634 highly similar to HSHLACW07 for leukocyte antigen C alpha chai major histocompatibility complex class I C histocompatability antigen; HLA class I heavy chain; HLA class I locus C HLA class I heavy chain
MHC-I	217436_x_at	HLA-J	MHC I component	MHC class I HLA-J gene exons 1-8 and major histocompatibility complex class I J (pseudogene) MHC class I HLA-J antigen; cell surface antigen; cell surface glycoprotein; class I gene; inactive antigen; integral membrane protein; major histocompatibility complex heavy chain MHC class I HLA-J antigen major histocompatibility complex, class I, J (pseudogene)
MHC-I	221875_x_at	HLA-F	MHC I component	dJ377H14.9 (major histocompatibility complex class I F (CDA12)) major histocompatibility complex class I F HTG; 60S Ribosomal Protein 7A; 60S Ribosomal Protein L23A; CDA12; CpG Island; HCGIX; HLA-F; HLA-G; interferon-inducible protein 1-8U; major histocompatibility complex; MHC; MICB; P5-1; PERB11.1; RPL23A; RPL7A match: proteins: Sw:P17693 Sw:P30515 Tr:O78132 Tr:Q30716 Tr:Q30443 Tr:O62903 Tr:Q31…
STAT1	200887_s_at	STAT1	STAT signal transduction	transcription factor ISGF-3 signal transducer and activator of transcription 1 91kD transcription factor transcription factor ISGF-3 signal transducer and activator of transcription 1, 91kD
STAT1	202269_x_at	GBP1	interferon response	UI-H-BI0p-aaw-f-03-0-UI.s1 guanylate binding protein 1 interferon-inducible 67kD clone MGC:39 guanylate binding protein 1 interferon-inducible 67kD guanylate binding protein 1, interferon-inducible, 67kD
STAT1	202270_at	GBP1	interferon response	guanylate binding protein isoform I (GBP-2) guanylate binding protein 1 interferon-inducible 67kD guanylate binding protein isoform I guanylate binding protein 1, interferon-inducible, 67kD
STAT1	202307_s_at	TAP1	antigen processing	RING4 ATP-binding cassette sub-family B (MDRTAP) member 2 ATP-binding cassette sub-family B (MDR/TAP) member 2 transporter 1, ATP-binding cassette, sub-family B (MDR/TAP)
STAT1	202531_at	IRF1	STAT signal transduction	HUMIFNRF1A interferon regulatory factor 1 gene interferon regulatory factor 1
STAT1	203915_at	CXCL9	interferon response	Humig monokine induced by gamma interferon chemokine; cytokine; Humig gene; secreted protein monokine induced by gamma interferon
STAT1	204279_at	PSMB9	antigen processing	nw16h03.s1 proteasome (prosome macropain) subunit beta type 9 (large multifunctional protease 2) proteasome (prosome, macropain) subunit, beta type, 9
STAT1	204533_at	CXCL10	interferon response	HSINFGER gamma-interferon inducible early response gene (with homology to platelet proteins) small inducible cytokine subfamily B (Cys-X-Cys) member 10 small inducible cytokine subfamily B (Cys-X-Cys), member
STAT1	209969_s_at	STAT1	STAT signal transduction	transcription factor ISGF-3 sequence Similar to signal transducer and activator of transcription 1 91kD clone MGC:34 signal transducer and activator of transcription 1 91kD transcription factor
STAT1	210029_at	INDO	interferon response	interferon-gamma-inducible indoleamine 2 3-dioxygenase (IDO) interferon-gamma-inducible indoleamine 2 3-dioxygenase (IDO) d indoleamine-pyrrole 2 3 dioxygenase indole 2,3-dioxygenase indoleamine 2,3-dioxygenase (IDO) (EC 1.13.11.17) indole 2,3-dioxygenase indoleamine-pyrrole 2,3 dioxygenase
STAT1	210163_at	CXCL11	interferon response	interferon stimulated T-cell alpha chemoattractant precursor interferon stimulated T-cell alphachemoattractant precursor small inducible cytokine subfamily B (Cys-X-Cys) member 11 chemokine; I-TAC interferon stimulated T-cell alpha chemoattractant precursor
STAT1	211122_s_at	CXCL11	interferon response	interferon stimulated T-cell alpha chemoattractant precursor small inducible cytokine subfamily B (Cys-X-Cys) member 11 chemokine; I-TAC interferon stimulated T-cell alpha chemoattractant precursor small inducible cytokine subfamily B (Cys-X-Cys), member
STAT1	219209_at	IFIH1	interferon response	zo23f04.s1 melanoma differentiation associated protein-5 accessory proteins BAP31/BAP29 EST
STAT1	AFFX-HUMISGF3A/M97935_3_at	- - -	interferon response	M97935 Homo sapiens transcription factor ISGF-3 mRNA, complete cds (_5, _MA, MB, _3 represent transcript regions 5 prime, MiddleA, MiddleB, and 3 prime respectively)
Interferon	202086_at	MX1	interferon inducible	p78 protein myxovirus (influenza) resistance 1 homolog of murine (interferon-inducible protein p78) p78 protein p78 protein myxovirus (influenza) resistance 1, homolog of murine (interferon-inducible protein p78) myxovirus (influenza virus) resistance 1, interferon-inducible
Interferon	202411_at	IFI27	interferon inducible	HSP27 p27 interferon alpha-inducible protein 27 interferon, alpha-inducible protein 27
Interferon	202869_at	OAS1	interferon inducible	(2-5'') oligo A synthetase E gene 2 5-oligoadenylate synthetase 1 (40-46 kD) (OAS1) transcript variant E 2',5'-oligoadenylate synthetase 1 (40-46 kD)
Interferon	203153_at	IFIT1	interferon inducible	HUMII56KD interferon-inducible 56 Kd protein interferon-induced protein with tetratricopeptide repeats 1
Interferon	204415_at	G1P3	interferon inducible	HSU22970 interferon-inducible peptide (6-16) gene interferon alpha-inducible protein (clone IFI-6-16) (G1P3) transcript variant interferon alpha-inducible protein (clone IFI-6-16) gene 6-16; interferon; interferon-inducible; interferon stimulatable response element (ISRE); minisatellite; expressed minisatellite; alternative splicing alternatively spliced using the second alternative exon 2 interf…
Interferon	204439_at	IFI44L	interferon inducible	expressed in osteoblast hypothetical protein expressed in osteoblast GS3686 The submitters designated this product as GS3686 hypothetical protein, expressed in osteoblast
Interferon	204747_at	IFIT3	interferon inducible	CIG49 (cig49) interferon-induced protein with tetratricopeptide repeats 4
Interferon	204972_at	OAS2	interferon inducible	71 kDa 25'' oligoadenylate synthetase (p69 2-5A synthetase) 2-5oligoadenylate synthetase 2 (OAS2) transcript variant 2'-5'oligoadenylate synthetase 2 2'-5'-oligoadenylate synthetase 2 (69-71 kD)
Interferon	205483_s_at	G1P2	interferon inducible	zx57e04.r1 interferon-stimulated protein 15 kDa interferon-stimulated protein, 15 kDa
Interferon	205552_s_at	OAS1	interferon inducible	1.6Kb 2-5A synthetase induced by interferon 2 5-oligoadenylate synthetase 1 (40-46 kD) (OAS1) transcript variant E 2' 5'-oligoadenylate synthetase 1 2',5'-oligoadenylate synthetase 1 (40-46 kD)
Interferon	213797_at	RSAD2	interferon inducible	cig5 sequence cig5 partial sequence
Interferon	214453_s_at	IFI44	interferon inducible	genehepatitis C-associated microtubular aggregate protein p44 interferon-induced hepatitis C-associated microtubular aggregate protein (44kD) hepatitis C-associated microtubular aggregate protein; p44 interferon-induced, hepatitis C-associated microtubular aggregate protein (44kD)
Interferon	218400_at	OAS3	interferon inducible	2-5oligoadenylate synthetase 3 2'-5'-oligoadenylate synthetase 3 (100 kD)
Interferon	218986_s_at	FLJ20035	-	DKFZp434E1722_s1 hypothetical protein FLJ20035 EST
Genes in red are not represented on the Nanostring platform and therfore are excluded from calculationg metagene values.

## Sheet: Karn 2017 JAMAonc
MHC2	T-Cell	B-Cell	MHC1	IFN	IL8-VEGF
CD74	ACAP1 (genes in red are not included in Nanostring panel)	CXCR5	HLA-C	IFI6	CXCL2
HLA-DMA	ARHGAP9	BLK	HLA-A	MX1	CXCL3
HLA-DPB1	BTK	FCRL1	HLA-H	IFI44	CXCL1
HLA-DMB	BTLA	MS4A1	HLA-B	IFI44L	CXCL6
HLA-DPA1	CD2	FCRL2	HLA-F	XAF1	CXCL5
HLA-DRA	CD27	CD19	PSMB8	IFIT1	IL8
	CD37	CD79A	PSMB9	IFIT2	ADM
	CD3D	ADAM6	TAP1	CMPK2	ANKRD37
	CD3E	MGC29506	TAP2	RSAD2	ANGPTL4
	CD3G	FCRL5		IFIT3	VEGFA
	CD4	TNFRSF17		OAS2
	CD48	LOC96610		OAS1
	CD53			OASL
	CXCR3			OAS3
	CXCR6
	DOCK2
	EVI2B
	FERMT3
	GVIN1
	GZMK
	ICOS
	IL10RA
	ITGAL
	ITK
	LAPTM5
	LCP2
	LILRB1
	LY9
	MYO1F
	NCF4
	NCKAP1L
	P2RY10
	PLEK
	PTPRC
	PTPRCAP
	RASAL3
	S1PR4
	SAMSN1
	SASH3
	SH2D1A
	SIRPG
	SIT1
	SLA2
	SLAMF1
	SLAMF6
	SNX20
	SP140
	SPI1
	TBC1D10C
	THEMIS
	TIGIT
	TRAT1
	TYROBP
	WAS
	WDFY4
	ZNF831
Genes in red are not represented on the Nanostring platform and therfore are excluded from calculationg metagene values.

## Sheet: Ayers PDL1 rev
Tumor Inflammation Signature
TIGIT
CD27
CD8A
PDCD1LG2
CXCR6
LAG3
CD274
CMKLR1
NKG7 (not included in Nanostring panel)
CCL5
PSMB10
IDO1
CXCL7/PPBP
HLADQA1/HLA-DQA1
CD276
STAT1
HLDDRB1 (not included in Nanostring panel)
HLAE/HLA-E

## Sheet: Mantovani M1 and M2 Macropgages
pan-macrophage	M1 macrophage signature	M2 macrophage
CD68	IFNg/IFNG	IL4
	TNFa/TNF	IL13
	IL12/IL12A	IL10
	iNOS/NOS2A/NOS	CD163
	IL6	JAK3
	CD86	STAT6
	JAK2	STAT3
	STAT1	SP1
	STAT2	CSF1R
	IRF1	CXCL13
	IRF8	CXCL14
	CXCL10	TLR1
	GM-CSF	TLR8
	IDO	CD23
	CD64	CCL17
	CXCL9	CCL22
	CD14	IRF4
	CD16	SOCS1
		CXCL12
		CXCR4
		CCL2
		CCR2
		CD206
